# Supplementary figures and images for: Intensified Use of Reproductive Technologies and Reduced Dimensions of Breeding Schemes Put Genetic Diversity at Risk in Dairy Cattle Breeds
Source: MDPI journal article supplement (doi:10.3390/ani10101903), 2020-10-17

Proportion of female donors and of sires and bulls born from embryo transfer

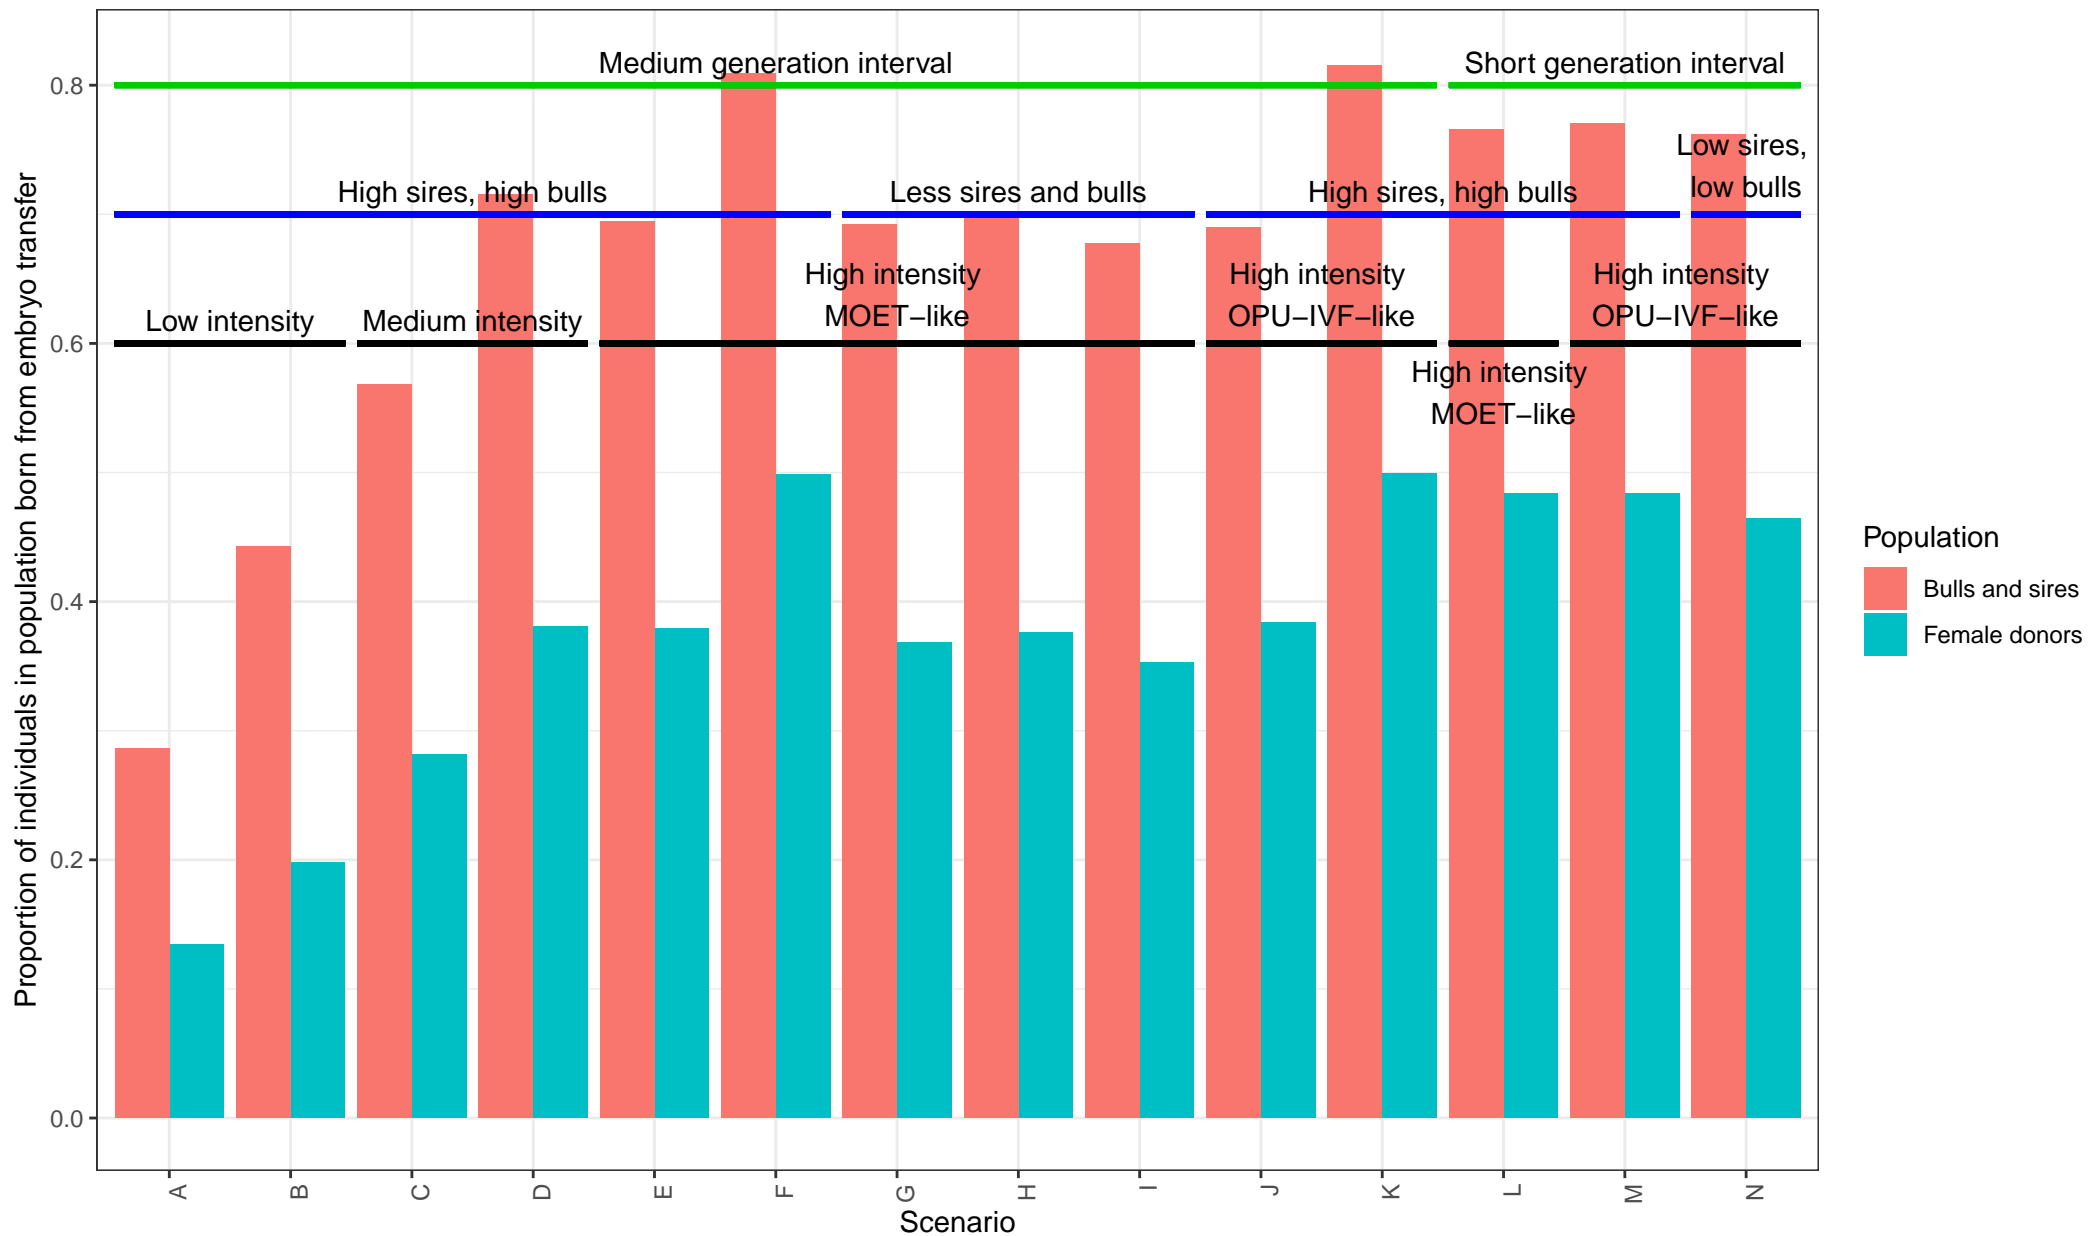

Supplement: s1 [file s1]
